# Supplementary material for: A new fluorescent pH probe for acidic conditions
Source: Royal Society of Chemistry journal article supplement (doi:10.1039/c5ra14174e), 2015-01-01
Supplement: c5ra14174e1.pdf [file c5ra14174e1.pdf]

## Supporting Information for Publication

### A new fluorescent pH probes for acid conditions

Xuan Zhang<sup>a,b</sup>, Guang-Jie Song<sup>c</sup>, Xiang-Jian Cao<sup>a,b</sup>, Jin-Ting Liu<sup>a</sup>, Ming-Yu Chen<sup>a,b</sup>, Xiao-Qun Cao<sup>c</sup>,  
Bao-Xiang Zhao<sup>a,\*</sup>

<sup>a</sup>*School of Chemistry and Chemical Engineering, Shandong University, Jinan 250100, PR China*

<sup>b</sup>*Taishan College, Shandong University, Jinan 250100, PR China*

<sup>c</sup>*Taishan Medical University, Tai'an 271000, PR China*

\*corresponding author: Institute of Organic Chemistry

School of Chemistry & Chemical Engineering

Shandong University

27# ShandaNanlu, Jinan 250100, PR China

Tel: 0086-531-88366425

Fax: 0086-531-88564464

Email address: bxzhao@sdu.edu.cn

## Contents

|                                                                                                                                                                                                              |   |
|--------------------------------------------------------------------------------------------------------------------------------------------------------------------------------------------------------------|---|
| <b>Table S1.</b> Summary of crystal data and structure refinement for the probe.....                                                                                                                         | 2 |
| <b>Table S2.</b> Selected geometric parameters (Å, °) .....                                                                                                                                                  | 3 |
| <b>Table S3.</b> Table S3 Hydrogen-bond geometry (Å, °).....                                                                                                                                                 | 3 |
| <b>Table S4.</b> Analysis of Y-X...Cg( $\pi$ -Ring) Interactions(Å, °) .....                                                                                                                                 | 3 |
| <b>Fig. S1.</b> (a) The <sup>1</sup> H NMR spectroscopy of the probe in DMSO-d <sub>6</sub> after adding a drop of DCl;<br>(b) The <sup>1</sup> H NMR spectroscopy of the probe in DMSO-d <sub>6</sub> ..... | 4 |
| <b>Fig. S2.</b> Absorption spectra of the probe .....                                                                                                                                                        | 4 |
| <b>Fig. S3.</b> <sup>1</sup> H NMR spectra of the probe in DMSO-d <sub>6</sub> .....                                                                                                                         | 5 |
| <b>Fig. S4.</b> <sup>1</sup> H NMR spectra of the probe in DMSO-d <sub>6</sub> with a drop of DCl.....                                                                                                       | 5 |
| <b>Fig. S5.</b> <sup>13</sup> C NMR spectra of the probe in DMSO-d <sub>6</sub> .....                                                                                                                        | 6 |
| <b>Fig. S5.</b> HRMS spectra of the probe .....                                                                                                                                                              | 6 |

**Table S1** Summary of crystal data and structure refinement for the probe

| Compound                                                                                    | probe                                                           |
|---------------------------------------------------------------------------------------------|-----------------------------------------------------------------|
| Empirical formula                                                                           | C <sub>12</sub> H <sub>13</sub> ClN <sub>2</sub> O <sub>2</sub> |
| Formula weight                                                                              | 252.69                                                          |
| Crystal system                                                                              | monoclinic                                                      |
| Space group                                                                                 | P2 <sub>1</sub> /c                                              |
| Temperature (K)                                                                             | 173                                                             |
| <i>a</i> , <i>b</i> , <i>c</i> (Å)                                                          | 4.7190(13), 22.606(6), 11.214(3)                                |
| $\alpha$ , $\beta$ , $\gamma$ (°)                                                           | 90, 92.837(3), 90                                               |
| V (Å <sup>3</sup> )                                                                         | 1194.8(6)                                                       |
| <i>Z</i>                                                                                    | 4                                                               |
| Calculated density [Mg/m <sup>3</sup> ]                                                     | 1.405                                                           |
| $\mu$ (mm <sup>-1</sup> )                                                                   | 0.311                                                           |
| Radiation [Å]                                                                               | MuK $\alpha$ , 0.71000                                          |
| Crystal size [mm]                                                                           | 0.09×0.10×0.10                                                  |
| <i>F</i> (000)                                                                              | 528                                                             |
| No. of measured, independent and observed [ <i>I</i> > 2 $\sigma$ ( <i>I</i> )] reflections | 5895, 2103<br>1993                                              |
| R <sub>int</sub>                                                                            | 0.015                                                           |
| $\theta$ Range for data collection [°]                                                      | 2.6–25.0                                                        |
| Ranges of indices <i>h</i> , <i>k</i> , <i>l</i>                                            | –5 ≤ <i>h</i> ≤ 5, –26 ≤ <i>k</i> ≤ 26 –13 ≤ <i>l</i> ≤ 13      |
| Final <i>R</i> indices [ <i>I</i> > 2 $\sigma$ ( <i>I</i> )]                                | <i>R</i> <sub>1</sub> = 0.0298, <i>wR</i> <sub>2</sub> = 0.0781 |
| Goodness of fit on <i>F</i> <sup>2</sup>                                                    | 1.02                                                            |
| $\Delta\rho$ (max./min) [e Å <sup>-3</sup> ]                                                | 0.32; –0.24                                                     |

**Table S2** Selected geometric parameters (Å, °)

|          |            |           |            |
|----------|------------|-----------|------------|
| C11—C5   | 1.7162(15) | N1—C5     | 1.3429(18) |
| O1—C1    | 1.2717(18) | N1—C6     | 1.3356(18) |
| O2—C1    | 1.2672(18) | N2—C4     | 1.4058(18) |
| C1—C2    | 1.476(2)   | N2—C6     | 1.3620(18) |
| C2—C3    | 1.3677(19) | N2—C7     | 1.3933(17) |
| C2—C8    | 1.437(2)   | C4—C5     | 1.3810(19) |
| C3—C4    | 1.4028(19) | C6—C9     | 1.489(2)   |
| C7—C8    | 1.3408(19) | C9—C10    | 1.533(2)   |
| C10—C11  | 1.522(2)   | C11—C12   | 1.519(2)   |
| C5—N1—C6 | 105.90(11) | C4—N2—C6  | 107.75(11) |
| C4—N2—C7 | 120.76(11) | C6—N2—C7  | 131.48(12) |
| O1—C1—O2 | 123.74(13) | O1—C1—C2  | 117.79(12) |
| O2—C1—C2 | 118.47(12) | C11—C5—N1 | 122.24(10) |

**Table S3** Hydrogen-bond geometry (Å, °).

| D—H...A                  | D—H  | H...A | D...A      | D—H...A |
|--------------------------|------|-------|------------|---------|
| O1—H1...O2 <sup>i</sup>  | 0.84 | 1.78  | 2.6107(17) | 167     |
| C8—H8...N1 <sup>ii</sup> | 0.95 | 2.57  | 3.353(2)   | 140     |

Symmetry codes: (i) 1-x, 1-y, -z; (ii) -1+x, 1/2-y, -1/2+z

**Table S4** Analysis of Y-X...Cg( $\pi$ -Ring) Interactions(Å, °).

| Y—X...Cg                    | X...Cg     | Y...Cg     | Y—X...Cg |
|-----------------------------|------------|------------|----------|
| C5—C11...Cg1 <sup>iii</sup> | 3.6890(12) | 4.1240(19) | 92.05(5) |
| C5—C11...Cg2 <sup>iii</sup> | 3.5087(12) | 3.6057(18) | 79.21(5) |

Symmetry codes: (iii) 1+x, y, z

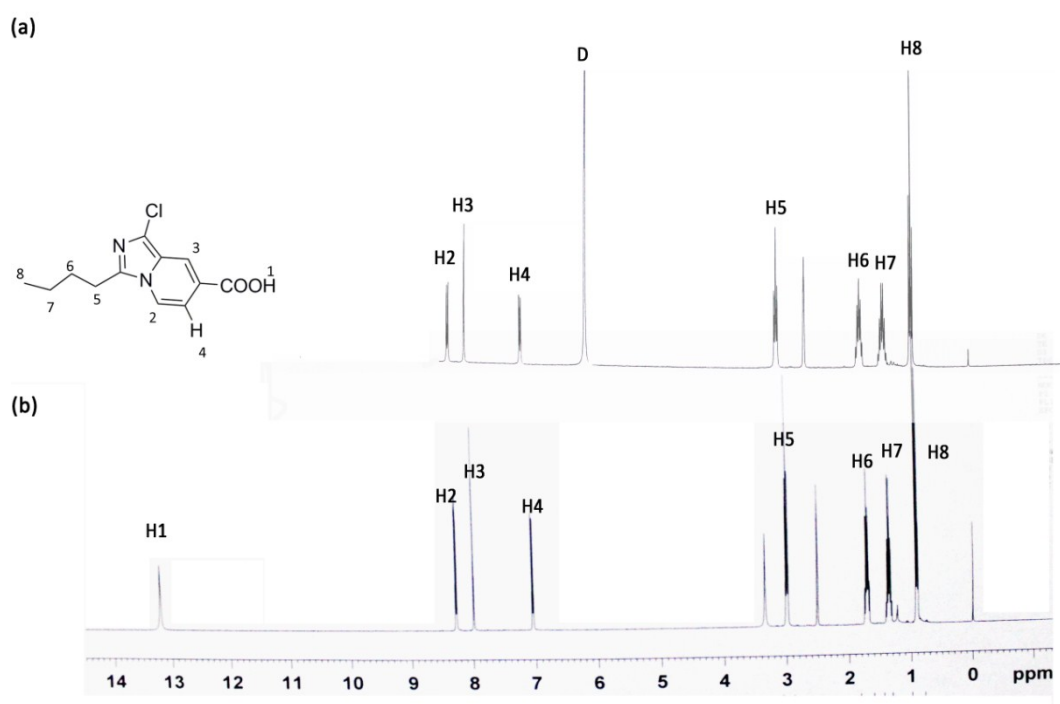

**Fig. S1** (a) The  $^1\text{H}$  NMR spectroscopy of the probe in  $\text{DMSO-d}_6$  after adding a drop of  $\text{DCl}$ ; (b) The  $^1\text{H}$  NMR spectroscopy of the probe in  $\text{DMSO-d}_6$

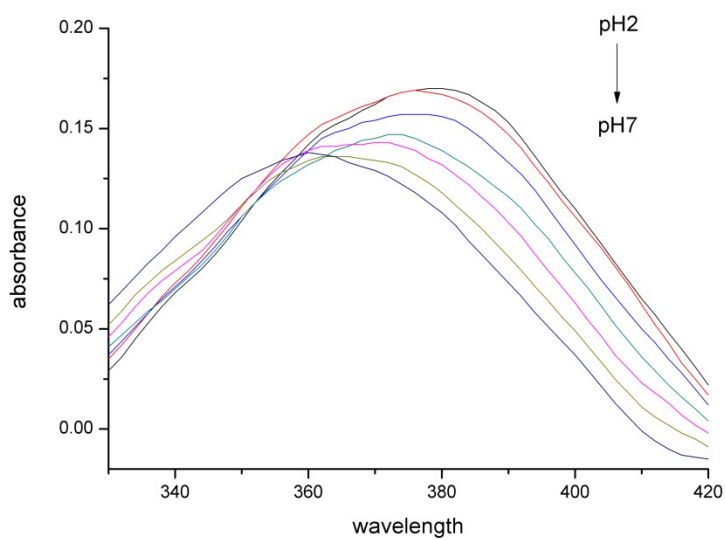

**Fig. S2** Absorption spectra of the probe ( $30 \mu\text{M}$ ) in solution (1:1, B-R-EtOH, v/v) with different pH.

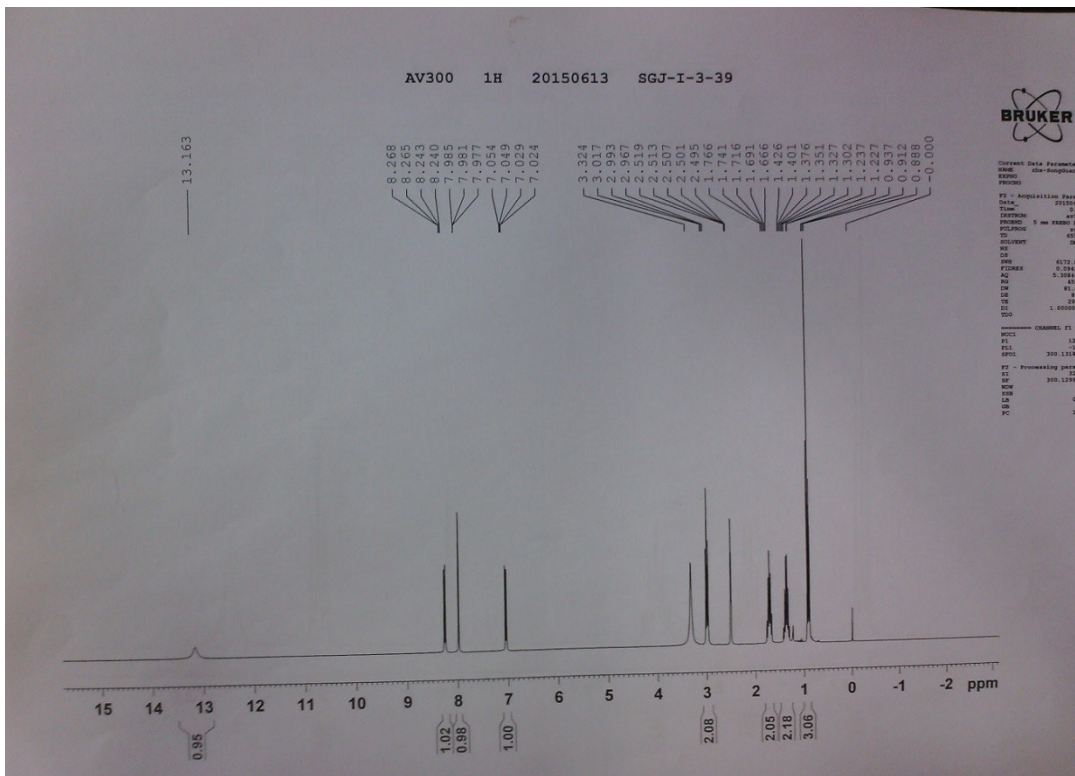

Fig. S3 <sup>1</sup>H NMR spectra of the probe in DMSO-*d*<sub>6</sub>

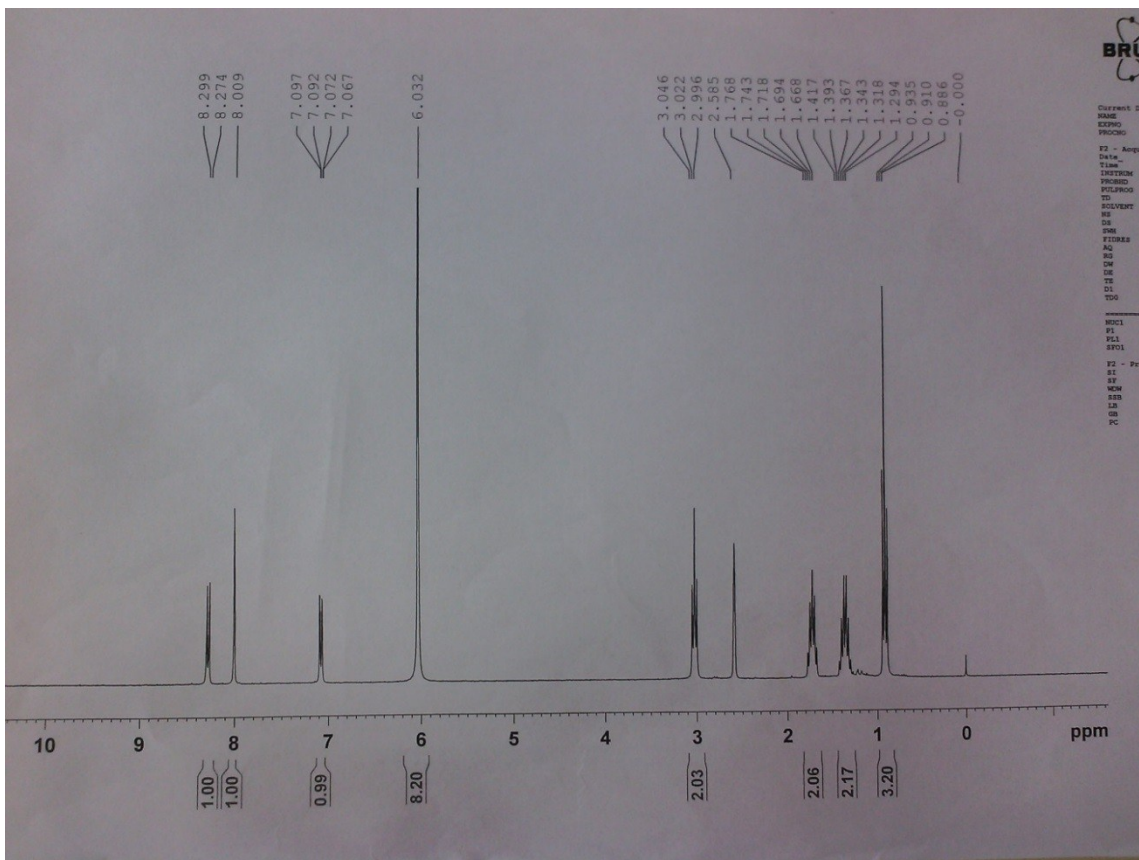

Fig. S4 <sup>1</sup>H NMR spectra of the probe in DMSO-*d*<sub>6</sub> with a drop of DCl

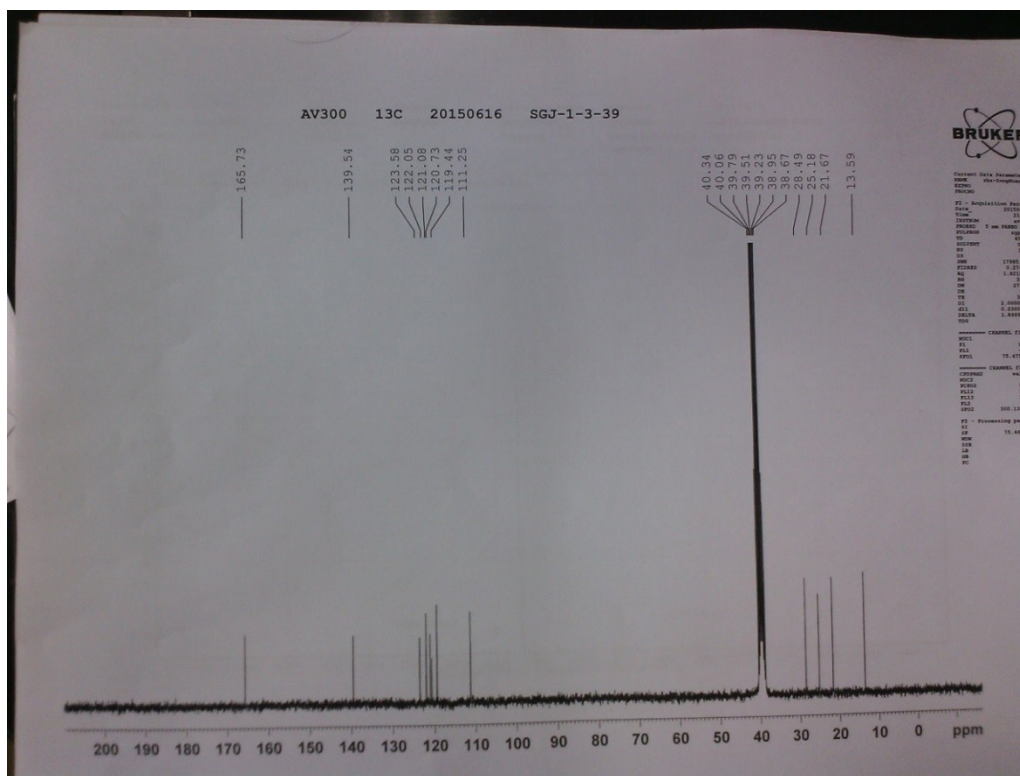

Fig. S5 <sup>13</sup>C NMR spectra of the probe in DMSO-*d*<sub>6</sub>

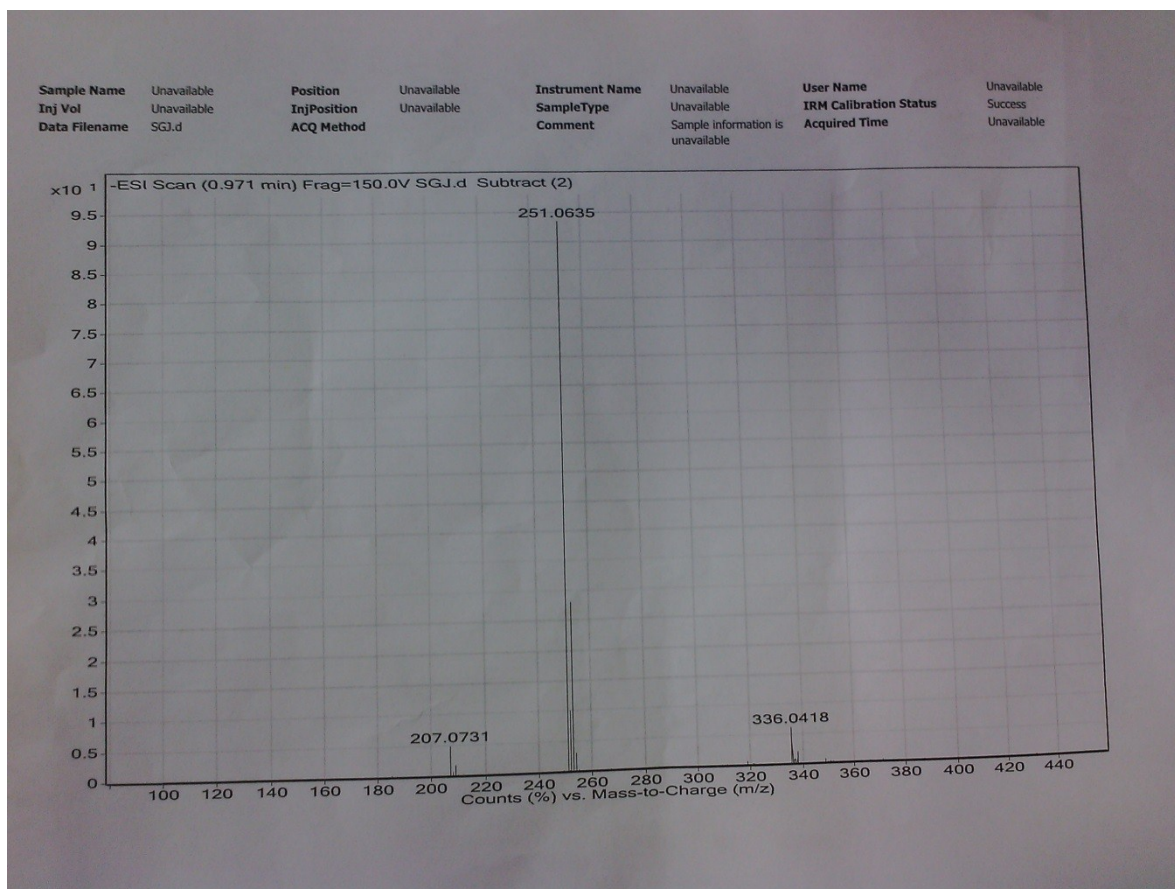

Fig. S6 HRMS spectra of the probe
